# Supplementary material for: Mandarin Chinese modality exclusivity norms
Source: PLoS One. 2019 Feb 20;14(2):e0211336. doi: 10.1371/journal.pone.0211336 (PMC6382104; doi:10.1371/journal.pone.0211336)
Supplement: S2 File — (XLSX) [file pone.0211336.s002.xlsx]

## Sheet: score_rating_ME
word (in traditional Chinese character)	word (in simplified Chinese character)	pinyin	translation	GustatoryStrengthMean	VisualStrengthMean	AuditoryStrengthMean	OlfactoryStrengthMean	HapticStrengthMean	DM	ME
皚皚	皑皑	ai2-ai2	pure white	0.111111	5	0.166667	0	0.222222	Visual	0.909091
矮	矮	ai3	short	0	5	0	0	0.7	Visual	0.877193
暗	暗	an4	dark	0.352941	5	0	0	0	Visual	0.934066
凹	凹	ao1	concave	0	4.86364	0	0	4.2	Visual	0.53661
白	白	bai2	white	1.23529	5	0	0	0	Visual	0.801887
斑斑	斑斑	ban1-ban1	spotty	0.222222	4.46154	0	0.380952	1.125	Visual	0.720799
薄	薄	bao2	thin	0.5625	2.61905	1.55556	1.47059	4.61538	Haptic	0.374467
笨	笨	ben4	clumsy	0	3.25	0.3125	0	0.619048	Visual	0.777224
扁	扁	bian3	flat	0	5	0.708333	0	4.54545	Visual	0.487625
癟	瘪	bie3	shrunken	0.136364	3.6	0.3	0.0909091	3.23529	Visual	0.476612
冰	冰	bing1	icy	3.625	3.27778	0.611111	0.772727	5	Haptic	0.330324
燦燦	灿灿	can4-can4	shiny	0.52381	4.55	0.47619	0	0.5	Visual	0.752066
蒼蒼	苍苍	cang1-cang1	vast/hazy/gray	0.238095	2.875	0.615385	0	0.176471	Visual	0.736245
長	长	chang2	long	0.333333	5	1.5	0.0555556	2.16667	Visual	0.546012
潮	潮	chao2	damp	1.29167	3.65	1.17647	1.1	4.16667	Haptic	0.269365
吵	吵	chao3	loud	0	0.860215	4.9697	0.010101	0.0707071	Auditory	0.840794
沉	沉	chen2	heavy	0.818182	2.47059	1.82353	0.363636	4	Haptic	0.383747
稠	稠	chou2	dense/creamy	3.8	1.95455	0.857143	1.38889	4.27778	Haptic	0.278591
臭	臭	chou4	smelly	3.29293	0.373737	0.0909091	5	0.0215054	Olfactory	0.567086
純	纯	chun2	pure	3.82353	3.83333	2.05882	3.83333	1.16667	Olfactory	0.181213
醇	醇	chun2	of intense taste/ mellow	4.2381	0.05	0.555556	3.8	0.619048	Gustatory	0.452146
粗	粗	cu1	rough	0.363636	4.23077	1.41667	0	4.90909	Haptic	0.449544
脆	脆	cui4	crisp	2.55556	1.20202	2.86022	0.108696	2.93939	Haptic	0.292855
大	大	da4	big	0.5	5	3.83333	0.1875	4.83333	Visual	0.335269
呆	呆	dai1	dull	0.125	3.55556	0.5625	0	0.2	Visual	0.80025
淡	淡	dan4	of mild taste	4.76768	1.74747	0.27957	3.27957	0.20202	Gustatory	0.444289
低	低	di1	low	0.0606061	4.0404	1.7957	0.107527	1.59596	Visual	0.523644
陡	陡	dou3	steep	0	4.11765	0	0	1.41176	Visual	0.744681
短	短	duan3	short	0	4.95455	0.681818	0.166667	3.33333	Visual	0.542289
鈍	钝	dun4	blunt	0.363636	2.95238	1.76471	1.45	4.45	Haptic	0.37214
方	方	fang1	square	0.25	5	0.142857	0.111111	3.45	Visual	0.546002
肥	肥	fei2	fat	2.8	4.6	0	0.166667	3.58333	Visual	0.412556
粉	粉	fen3	powdery	0.75	4.33333	0.125	0.375	1.33333	Visual	0.608434
甘	甘	gan1	sweet	5	0.619048	0	1.90476	0	Gustatory	0.664557
高	高	gao1	high	0.129032	4.53763	1.21212	0.0606061	1.82828	Visual	0.576366
鼓	鼓	gu3	bulged	0.388889	3.625	1.25	0.1	3.25	Visual	0.409223
光	光	guang1	naked/beamy	0.047619	4	0	0	1.92308	Visual	0.669939
廣	广	guang3	wide	0.571429	4.35	0.35	0.55	1.20833	Visual	0.569009
滾滾	滚滚	gun3-gun3	billowing	0.636364	3.55	1.90476	0.5	0.6875	Visual	0.419035
寒	寒	han2	chilling	2.28571	2.72222	0.666667	0.681818	4.54167	Haptic	0.355567
浩浩	浩浩	hao4-hao4	torrential	0	3.30769	1.45455	0.333333	0	Visual	0.649131
黑	黑	hei1	black	0.040404	4.97959	0.0215054	0.0322581	0.0808081	Visual	0.961882
橫	横	heng2	horizontal	0	2.85	0	0.176471	0.666667	Visual	0.771702
紅	红	hong2	red	0	5	0.05	0.0588235	0.388889	Visual	0.909469
厚	厚	hou4	thick	1.25	5	1.25	0.916667	5	Haptic	0.304348
花	花	hua1	colorful	1.16667	5	0.65	2.04545	0.555556	Visual	0.471926
滑	滑	hua2	smooth	2.90909	3.15	1.17647	0	5	Haptic	0.408645
黃	黄	huang2	yellow	0.1	5	0.3	0	0	Visual	0.925926
煌煌	煌煌	huang2-huang2	brilliant/sparkling	0.285714	2.22222	0.208333	0	0.285714	Visual	0.740251
灰	灰	hui1	grey	0.444444	5	0.307692	0	0	Visual	0.869242
渾	浑	hun2	turbid	1.27273	4.625	3.53846	0.454545	0	Visual	0.467609
尖	尖	jian1	sharp	0.131313	3.58586	1.75758	0.10101	4.67742	Haptic	0.446341
鹹	咸	xian2	salty	4.875	0.428571	0	2	0	Gustatory	0.667482
僵	僵	jiang1	stiff	0.1	2.45	1.33333	0.2	3.44444	Haptic	0.44428
焦	焦	jiao1	charred	4.75	3.17647	0	4.05882	1.68182	Gustatory	0.34755
皎皎	皎皎	jiao3-jiao3	glistening white	0.238095	3.85	0.45	0	0.45	Visual	0.771838
緊	紧	jin3	tense	0.176471	2.66667	1.3	0	4.0625	Haptic	0.495086
淨	净	jing4	clean	1.70833	3.70588	2.61111	1.41667	1.94444	Visual	0.201048
靜	静	jing1	quiet	0.0606061	1.17172	4.95699	0.0430108	0.181818	Auditory	0.766116
炯炯	炯炯	jiong3-jiong3	bright	0.380952	4.77778	0	0	0	Visual	0.926154
苦	苦	ku3	bitter	4.9697	0.313131	0.141414	1.50505	0.0537634	Gustatory	0.70398
寬	宽	kuan1	broad	0.1	4.53846	1.52941	0.166667	2.15	Visual	0.523123
辣	辣	la4	spicy hot	4.96774	1.4086	0.121212	2.40404	0.828283	Gustatory	0.498108
藍	蓝	lan2	blue	0	5	0	0	0	Visual	1
爛	烂	lan4	tender	3.84615	3.2	1.55556	1.77778	3.30769	Gustatory	0.167354
朗朗	朗朗	lang3-lang3	bright/ loud	0	1.15385	4.11111	0	0.111111	Auditory	0.764706
冷	冷	leng3	cold	1.52525	1.57576	0.393939	0.295918	4.53763	Haptic	0.509301
歷歷	历历	li4-li4	clear	0.111111	3.81818	0.952381	0.333333	0.444444	Visual	0.655023
涼	凉	liang2	cool	4.13636	2.07692	0.416667	1.9375	4.94118	Haptic	0.334935
亮	亮	liang4	bright	0.020202	4.91919	0.89899	0.030303	0.204301	Visual	0.806685
寥寥	寥寥	liao2-liao2	sparse	0.52381	4.25	2	0	0.0909091	Visual	0.619108
烈	烈	lie4	scorching	3.66667	3.72727	1	3.70588	2	Visual	0.193426
粼粼	粼粼	lin2-lin2	clear (of water)	0	4.75	0.35	0	0.538462	Visual	0.842428
嶙嶙	嶙嶙	lin2-lin2	jagged (of peaks)	0.222222	2.65	1.33333	0.0588235	1.18182	Visual	0.475777
凜凜	凛凛	lin2-lin2	cold	0.35	2.33333	0.583333	0.208333	2.38462	Haptic	0.371404
綠	绿	lv4	green	0	5	0.142857	0.142857	0	Visual	0.945946
麻	麻	ma2	trembling	4.75	0.952381	1.11765	1.38889	4.76923	Haptic	0.294098
滿	满	man3	full	0.791667	5	1.28571	0.571429	4	Visual	0.380174
漫漫	漫漫	man4-man4	boundless	0.0416667	2.19048	0.416667	0.0454545	0	Visual	0.813015
茫茫	茫茫	mang2-mang2	vast	0.3	4.63636	1.20833	0.764706	0.0625	Visual	0.656042
密	密	mi4	dense	1	4.90909	2	0.333333	3.55556	Visual	0.387842
綿綿	绵绵	mian2-mian2	continuous	2.6	3.05	0.916667	0.333333	4.25	Haptic	0.351271
漠漠	漠漠	mo4-mo4	misty	0.411765	2.5	0.35	0	0.291667	Visual	0.703545
木	木	mu4	numb	2.46154	2.72727	0.25	0.6875	3.29167	Haptic	0.322964
嫩	嫩	nen4	tender	3.875	4.45833	1.05	0.3	4.5	Haptic	0.296122
膩	腻	ni4	greasy	4.66667	2	3.16667	3.13636	1.81818	Gustatory	0.192623
蔫	蔫	nian1	withering	0.85	2.45455	0.45	0.75	1.33333	Visual	0.343369
黏	黏	nian2	sticky	1.95	2.55556	2.22222	0.363636	5	Haptic	0.383443
濃	浓	nong2	intense taste/concentrated	4.30108	2.05376	0.191919	2.73737	1.13131	Gustatory	0.394525
暖	暖	nuan3	warm	2.5	4.5	1.11765	0.875	4.66667	Haptic	0.277588
胖	胖	pang4	fat	0	4.8125	0	0	2.8125	Visual	0.631148
偏	偏	pian2	inclined to one side	0.15	3.94444	1.38889	0.461538	0.8	Visual	0.562567
破	破	po4	broken	0.294118	3.27273	3	0.15	2	Visual	0.358241
齊	齐	qi2	neat	0.333333	4.61111	2.55556	0	1.8	Visual	0.495818
乾	乾	gan1	dry	2.16129	2.55914	0.30303	0.383838	4.42424	Haptic	0.419183
淺	浅	qian3	shallow	1.20833	3.46154	1	1.42857	1.94118	Visual	0.272306
強	强	qiang2	strong	2.41667	3.46154	5	2.125	1.84615	Auditory	0.212389
青	青	qing1	green	0.538462	5	0	0.615385	0.277778	Visual	0.777409
清	清	qing1	limpid	2.94118	4.83333	3.61111	3.25	0.3125	Visual	0.302435
輕	轻	qing1	light	1.7	1.76471	4.05556	0.772727	4	Auditory	0.267049
全	全	quan2	full	1	3.1	0.1875	0.227273	0.1	Visual	0.650086
熱	热	re4	hot	3.41667	2.35	0.136364	1.09524	5	Haptic	0.405362
融融	融融	rong2-rong2	harmonious	0.541667	1.15385	0.45	0	0.764706	Visual	0.396481
柔	柔	rou2	soft	2.69231	4.33333	4.33333	0.809524	5	Haptic	0.244079
軟	软	ruan3	soft	2.33333	0.923077	1.61538	0	5	Haptic	0.506494
銳	锐	rui4	sharp	2.25	3.625	3.53846	1.17647	4.41176	Haptic	0.215662
臊	臊	sao1	of urine's smell	2.30303	0.333333	0.262626	2.50505	0.408602	Olfactory	0.385784
澀	涩	se4	astringent	5	0.833333	0.904762	1.53846	1.95238	Gustatory	0.407341
森森	森森	sen1-sen1	dense	0	3.94118	0.7	0.555556	0.384615	Visual	0.706134
羶	膻	shan1	of mutton's smell	4.1828	0.376344	0.0707071	4.12121	0.282828	Gustatory	0.455185
閃閃	闪闪	shan3-shan3	sparkling	0	4.83333	0.333333	0	0	Visual	0.935484
深	深	shen1	deep	0.888889	4.38889	2.72222	0.409091	4.41667	Haptic	0.312463
濕	湿	shi1	wet	1.8	3.25	0	1.95	4.95833	Haptic	0.414634
瘦	瘦	shou4	thin	0	5	0.0416667	0	2.46154	Visual	0.666382
鬆	松	song1	shaggy	0	1.375	0.791667	0.125	4.54167	Haptic	0.664634
酥	酥	su1	crisp/flaky	4.91667	1.2	2.83333	0.944444	4.36364	Gustatory	0.278594
素	素	su4	plain	3.45455	3.69231	0.846154	1.61111	0.764706	Visual	0.282347
酸	酸	suan1	sour	4.9798	0.393939	0.182796	4.11828	0.171717	Gustatory	0.488302
燙	烫	tang4	scalding	3.2	1.35294	0	0.181818	5	Haptic	0.513623
滔滔	滔滔	tao1-tao1	surging	0	2.76923	3.54545	0	0.888889	Auditory	0.49218
疼	疼	teng2	painful	0	1.83333	0.4	0	4.94444	Haptic	0.688854
甜	甜	tian2	sweet	5	1.03226	0.565657	2.35354	0.121212	Gustatory	0.537746
亭亭	亭亭	ting2-ting2	erect	0.047619	4.625	0	0	0.166667	Visual	0.95572
痛	痛	tong4	painful	0.161616	1.23232	0.537634	0.0430108	4.46465	Haptic	0.686671
凸	凸	tu1	protruding	0.166667	4.2	0.291667	0	5	Haptic	0.517688
禿	秃	tu1	bald	0.05	4.83333	0	0	3.46154	Visual	0.579198
窪	洼	wa1	hollow	0	4.25	0.35	0	2.90909	Visual	0.565981
歪	歪	wai1	slanting	0	5	0.571429	0	1.70833	Visual	0.686836
彎	弯	wan1	bent	0	3.27778	0.333333	0	4.44444	Haptic	0.551724
汪汪	汪汪	wang1-wang1	tearful	0	0.6	3.4	0.190476	0	Auditory	0.811364
旺	旺	wang4	flourishing	0.588235	2.22222	0.588235	0.444444	0	Visual	0.578231
微微	微微	wei1-wei1	slight	2.8	2	3.5	3.23077	3.63636	Haptic	0.107889
巍巍	巍巍	wei1-wei1	towering/ lofty	0	4.83333	0.45	0.0588235	0.5	Visual	0.82732
溫	温	wen1	lukewarm	3.19048	1.29412	0.722222	0.666667	3.85	Haptic	0.327386
烏	乌	wu1	black	0	2.75	0.461538	0	0	Visual	0.856287
稀	稀	xi1	sparse	2.83333	2.52941	0.454545	1.75	2.23529	Gustatory	0.242669
細	细	xi4	thin	0.181818	4.5	3.22222	0	4.4375	Visual	0.364622
鮮	鲜	xian1	tasty	5	2.3	0.294118	4.15	1.22222	Gustatory	0.362931
纖纖	纤纤	xian1-xian1	slender	0.0416667	2.5625	0.666667	0	3.04167	Haptic	0.481848
香	香	xiang1	fragrant	4.32258	0.688172	0.010101	4.83838	0.121212	Olfactory	0.483774
響	响	xiang3	loud	0.0645161	0.548387	4.9798	0.040404	0.173469	Auditory	0.850655
瀟瀟	潇潇	xiao1-xiao1	whistling	0	1.83333	3.16667	0.285714	0.5	Auditory	0.547325
小	小	xiao3	small	0.0606061	4.66667	1.62366	0.0645161	3.73737	Visual	0.453673
斜	斜	xie2	inclined	0	4.5	0	0	2.3	Visual	0.661765
辛	辛	xin1	spicy hot	5	0.363636	0.0833333	3.94444	0.208333	Gustatory	0.512166
腥	腥	xing1	of fishy smell	4.34238	0.558333	0.164905	4.59072	0.210417	Olfactory	0.448558
啞	哑	ya3	dumb	0.030303	0.333333	3.47475	0.0306122	0.0645161	Auditory	0.875666
炎炎	炎炎	yan2-yan2	scorching	0.5	2.90909	0.05	0	0.5	Visual	0.734788
泱泱	泱泱	yang1-yang1	vast/ magnificent	0	1.3125	0.583333	0	0.125	Visual	0.649485
洋洋	洋洋	yang2-yang2	copious	0.277778	2.31818	1	0	0.181818	Visual	0.613636
癢	痒	yang3	itchy	0.0408163	0.424242	0.141414	0.0306122	4.50538	Haptic	0.87016
依依	依依	yi1-yi1	be reluctant to part	0	0.823529	0.363636	0	0.0625	Visual	0.659
熠熠	熠熠	yi4-yi4	bright	0	2.625	0.5	0.235294	0.272727	Visual	0.722539
隱隱	隐隐	yin3-yin3	faint	0.35	3.47059	3.875	1.72727	1.27273	Auditory	0.329575
盈盈	盈盈	ying2-ying2	lucid	0	1.125	1.5	0	0.5	Auditory	0.48
硬	硬	ying4	hard	2.15385	4.125	1.44444	0.222222	5	Haptic	0.369068
郁郁	郁郁	yu4-yu4	luxuriant	0.65	1.84615	0.3125	0.181818	0.380952	Visual	0.493659
圓	圆	yuan2	round	0.0909091	4.73737	0.111111	0.010101	4.36559	Visual	0.507486
雜	杂	za2	mixed	4.58333	4.2381	4.88889	2.54545	1.5	Auditory	0.190861
髒	脏	zang1	dirty	1.16667	5	0.363636	1.375	2.18182	Visual	0.459632
燥	燥	zao4	dry	1.72727	1	1.09524	0.888889	1	Gustatory	0.146791
窄	窄	zhai3	narrow	0	4.64706	0.714286	0.111111	2.72727	Visual	0.566733
脹	胀	zhang4	swelling (in pain)	0	2.57143	0.555556	0	4.09091	Haptic	0.566773
整	整	zheng3	orderly	0.0769231	2.05	0.3	0.277778	1	Visual	0.532587
正	正	zheng4	upright	2.5	3.58824	0.916667	0.3	1.5	Visual	0.373455
直	直	zhi2	straight	0	4.69231	0.25	0	4.22222	Visual	0.512007
重	重	zhong4	heavy	3.05	2.36364	2.08333	2.14286	4.16667	Haptic	0.150895
壯	壮	zhuang4	strong	0.166667	5	0.428571	0	3.1875	Visual	0.569299
灼灼	灼灼	zhuo2-zhuo2	shining/ scorching	1.38889	3.1	0.47619	0.375	2.54167	Visual	0.345736
紫	紫	zi3	purple	0	3.88235	0	0	0	Visual	1
縱	纵	zong4	vertical	0.166667	2.61905	0.0416667	0	0.615385	Visual	0.760739
