# Supplementary material for: Mandarin Chinese modality exclusivity norms
Source: PLoS One. 2019 Feb 20;14(2):e0211336. doi: 10.1371/journal.pone.0211336 (PMC6382104; doi:10.1371/journal.pone.0211336)
Supplement: S5 File — (XLSX) [file pone.0211336.s005.xlsx]

## Sheet: ajectival compounds
Word (traditional characters)	Word (simplified characters)	Pinyin	Morpheme-to-Morpheme translation	English translation	Type (Auditory, Visual, Haptic, Olfactory, Gustatory)	GustatoryStrengthMean	VisualStrengthMean	AuditoryStrengthMean	OlfactoryStrengthMean	HapticStrengthMean	Dominant modality	Modality exclusivity
乾淨	乾净	gan1-jing4	dry-clean	clean	H_V	1.96296	4.22222	2.77778	1.62963	1.96296	Visual	0.206488
冷峻	冷峻	leng3-jun4	cold-steep	frosty	H_V	0.185185	3.62963	2.44444	0.37037	1	Visual	0.45145
冷淡	冷淡	leng3-dan4	cold-not salty/of mild taste	frigid	H_G	0.703704	3.2963	1.96296	0.407407	0.777778	Visual	0.404139
冷漠	冷漠	leng3-mo4	cold-desert	indifferent	H_V	0.0740741	3.77778	2.59259	0.296296	0.518519	Visual	0.510197
冷然	冷然	leng3-ran2	cold-appearance	frigid	H_V	0.518519	3.25926	2.48148	0.666667	1.22222	Visual	0.33636
冷酷	冷酷	leng3-ku4	cold-of intense taste of wine	grim	H_G	0.222222	3.7037	2.55556	0.259259	0.62963	Visual	0.472355
冷靜	冷静	leng3-jing4	cold-clear	calm	H_V	0.222222	3.18519	2.25926	0.0740741	0.296296	Visual	0.515329
凝重	凝重	ning2-zhong4	curdling-heavy	stony	V_H	0.481481	3.2963	2.51852	0.888889	0.555556	Visual	0.363632
厚重	厚重	hou4-zhong4	thick-heavy	massive	V_H	2.77778	3.2963	2.48148	2.44444	3.11111	Visual	0.060367
圓潤	圆润	yuan2-run4	round-moist	rounded	V_T	1.81481	4.14815	2.55556	0.592593	3.33333	Visual	0.285712
嬌柔	娇柔	jiao1-rou2	tender-soft	feminine	V_H	0.333333	3.62963	2.85185	0.37037	2.44444	Visual	0.342304
平淡	平淡	ping2-dan4	of level tone-not salty/of mild taste	insipid	A_G	3.77778	3.22222	3.03704	2.55556	0.444444	Gustatory	0.25568
平滑	平滑	ping2-hua2	of level tone-smooth	smooth	A_H	1.92593	3.62963	2.59259	0.777778	4.74074	Haptic	0.289971
微弱	微弱	wei1-ruo4	slight-weak	weak	V_H	2.33333	3.03704	4.22222	2.48148	2.07407	Auditory	0.151831
柔和	柔和	rou2-he2	soft-harmonious	soft	H_A	2.55556	4.2963	4.18519	2.2963	3.11111	Visual	0.121621
柔細	柔细	rou2-xi4	soft-thin	fine	H_V	1.88889	3.07407	3.14815	0.592593	4.25926	Haptic	0.282855
柔美	柔美	rou2-mei3	soft-tasty	graceful	H_G	1.07407	4.40741	3.96296	0.518519	1.66667	Visual	0.334392
柔順	柔顺	rou2-shun4	soft-along	soft and smooth	H_V	1.85185	3.11111	2.59259	0.666667	4.33333	Haptic	0.292033
沉重	沉重	chen2-zhong4	deep-heavy	heavy	V_H	1.03704	3.44444	3.59259	0.925926	1.85185	Auditory	0.245732
淒涼	凄凉	qi1-liang2	cloudy and rainy-cool	bleak	V_H	0.185185	3.77778	3.03704	0.481481	0.222222	Visual	0.46634
淡然	淡然	dan4-ran2	not salty/of mild taste-appearance	indifferent	G_V	1.44444	1.96296	2.11111	1.18519	0.62963	Auditory	0.202017
清冷	清冷	qing1-leng3	limpid-cold	chilly	V_H	1	3.44444	2.33333	1.11111	2.22222	Visual	0.241756
清淡	清淡	qing1-dan4	not salty/of mild taste	insipid	V_G	4.81481	1.62963	1.44444	3.18519	0.333333	Gustatory	0.392854
清甜	清甜	qing1-tian2	limpid-sweet	slightly sweet	V_G	4.55556	1.22222	1.85185	2.7037	0.296296	Gustatory	0.400693
清脆	清脆	qing1-cui4	limpid-crisp	crisp	V_H	1.7037	1.2963	4.37037	0.333333	1.25926	Auditory	0.450408
清鮮	清鲜	qing1-xian1	limpid-tasty	fresh	V_G	4.2963	2.25926	0.962963	2.7037	0.62963	Gustatory	0.337881
溫和	温和	wen1-he2	lukewarm-harmonious	gentle	H_A	3.51852	3.44444	3.48148	2.51852	3.07407	Gustatory	0.0623553
溫馨	温馨	wen1-xin1	lukewarm-fragrant	cozy/ warm	H_O	0.777778	4	2.59259	0.518519	1.18519	Visual	0.383669
濃厚	浓厚	nong2-hou4	of intense taste-thick	dense	G_V	3.96296	2.88889	1.25926	3.77778	1	Gustatory	0.229883
濃烈	浓烈	nong2-lie4	of intense taste-scorching	strong	G_H	4.48148	2.59259	1.55556	4.40741	0.555556	Gustatory	0.288826
濃郁	浓郁	nong2-yu4	of intense taste-dense	rich	G_V	4.14815	2	0.888889	4.55556	0.555556	Olfactory	0.329266
濃重	浓重	nong2-zhong4	of intense taste-heavy	strong	G_H	4.07407	2.7037	2	3.85185	0.703704	Gustatory	0.252776
濕漉漉	湿漉漉	shi1-lu-lu	damp-dripping	damp	H_V	0.518519	3.85185	0.444444	0.777778	4.51852	Haptic	0.402926
火辣	火辣	huo3-la4	fire-hot (in taste)	burning	H_G	4.22222	3.92593	1.2963	2.62963	1.88889	Gustatory	0.209548
熱辣	热辣	re4-la4	hot-hot (in taste)	scorching	H_G	4.40741	3.11111	1.66667	1.85185	2.66667	Gustatory	0.199999
燦爛	灿烂	can4-lan4	bright-tender	glorious	V_H	0.185185	3.81481	1.40741	0.037037	0.185185	Visual	0.671041
甜潤	甜润	tian2-run4	sweet-moist	pleasantly sweet	G_H	4.22222	1.7037	2.25926	2.18519	0.666667	Gustatory	0.322145
痛苦	痛苦	tong4-ku3	painful-bitter	painful	H_G	0.62963	4.07407	3	0.444444	1.2963	Visual	0.38431
硬繃繃	硬绷绷	ying4-beng-beng	hard-binding	hard	H_V	0.925926	3.07407	2.2963	0.259259	4.59259	Haptic	0.388701
粗壯	粗壮	cu1-zhuang4	rough-big	brawny	H_V	0.148148	3.98214	0.925926	0.222222	3.44444	Visual	0.439528
粗大	粗大	cu1-da4	rough-big	thick	H_V	0.37037	3.2963	0.666667	0.0740741	3.66667	Haptic	0.444949
細滑	细滑	xi4-hua2	thin-smooth	fine	V_H	3.40741	2.66667	1.85185	0.962963	4.55556	Haptic	0.267216
細膩	细腻	xi4-ni4	thin-greasy	fine and smooth	V_G	3.33333	3.25926	3.48148	1.55556	3.62963	Haptic	0.135921
羸弱	羸弱	lei2-ruo4	thin-weak	frail	V_H	0.259259	3.25926	2.44444	0.259259	1.11111	Visual	0.409085
苦楚	苦楚	ku3-chu3	bitter-painful	suffering	G_H	1.74074	2.74074	2.22222	0.851852	0.407407	Visual	0.29302
苦澀	苦涩	ku3-se4	bitter-rough	bitter	G_H	4.51852	1.11111	1.96296	2	0.296296	Gustatory	0.426962
蒼勁	苍劲	cang1-jin4	green-strong	vigorous	V_H	0.444444	3.66667	2.22222	0.148148	1.18519	Visual	0.458931
蒼涼	苍凉	cang1-liang2	green-cool	bleak	V_H	0.222222	3.85185	3.11111	0.407407	0.62963	Visual	0.441436
虛弱	虚弱	xu1-ruo4	empty-weak	weak	V_H	0.333333	3.81481	3.14815	0.333333	1.55556	Visual	0.379028
豐潤	丰润	feng1-run4	full-moist	plump	V_H	2.14815	3.66667	1.37037	0.851852	3.33333	Visual	0.247555
軟綿綿	软绵绵	ruan3-mian2-mian2	soft-cotton	soft	H_V	2.37037	3.2963	2.40741	0.592593	4.77778	Haptic	0.311292
輕微	轻微	qing1-wei1	light-slight	slight	H_V	2.7037	2.14815	3.07407	2.59259	2.03704	Auditory	0.0825952
輕盈	轻盈	qing1-ying2	light-full	lightsome	H_V	0.888889	3.74074	2.33333	0.814815	2.55556	Visual	0.283151
輕飄飄	轻飘飘	qing1-piao1-piao1	light-fluttering	buoyant	H_V	0.814815	3.14815	2.25926	0.37037	2.74074	Visual	0.297616
輕鬆	轻松	qing1-song1	light-shaggy	relaxing	H_V	0.777778	3	2.66667	0.518519	1.22222	Visual	0.303164
酸澀	酸涩	suan1-se4	sour-rough	acerbic	G_H	4.77778	1.48148	1.18519	2.40741	0.259259	Gustatory	0.446882
醇厚	醇厚	chun2-hou4	of intense taste of wine-thick	mellow	G_V	4.11111	1.77778	2.33333	2.62963	0.62963	Gustatory	0.303223
醇淨	醇净	chun2-jing4	of intense taste of wine-clean	pure	G_V	3.37037	2.07407	2	2.55556	0.481481	Gustatory	0.275616
青澀	青涩	qing1-se4	green-rough	astringent	V_H	3.48148	3.22222	1.7037	1.03704	0.444444	Gustatory	0.307113
鬆軟	松软	song1-ruan3	shaggy-soft	floppy	V_H	2.7037	3.44444	1.44444	0.666667	4.2963	Haptic	0.289083
鮮潤	鲜润	xian1-run4	tasty-moist	fresh	G_H	3.62963	2.33333	0.925926	1.74074	1.33333	Gustatory	0.271373
